# Supplementary material
Source: PubMed Central journal article supplement (PMC6753834)
Supplement: NIHMS1045140-supplement-methods.pdf [file NIHMS1045140-supplement-methods.pdf]

## **Peaks, Means and Determinants of Real-Time TVOC Exposures Associated with Cleaning and Disinfecting Tasks in Healthcare Settings**

M. Abbas Virji<sup>1\*</sup>, Xiaoming Liang<sup>1</sup>, Feng-Chiao Su<sup>1</sup>, Ryan F. LeBouf<sup>1</sup>, Aleksandr B. Stefaniak<sup>1</sup>, Marcia L. Stanton<sup>1</sup>, Paul K. Henneberger<sup>1</sup>, and E. Andres Houseman<sup>2</sup>

<sup>1</sup>National Institute for Occupational Safety and Health, Respiratory Health Division, Morgantown, WV

<sup>2</sup>Independent consultant, La Center, WA

\*Correspondence to: M. Abbas Virji, Centers for Disease Control and Prevention, National Institute for Occupational Safety and Health, Respiratory Health Division, Mailstop H-2800, Morgantown, WV 26505. Email: MVirji@cdc.gov, phone: 304-285-5797, Fax: 304-285-5820

**Supplementary File**

## Supplementary Methods

A user-friendly R-code demonstrated on a simulated example dataset, can be downloaded from either one of the links below:

1. <https://github.com/eahouseman/rtxm>
2. <https://www.cdc.gov/niosh/topics/drst/> under the NIOSH Resources section of: A Bayesian Approach for Modeling Real-Time Exposure Data with Left Censoring:

Portion of the R-code used to conduct these analyses is provided below:

### R-Code

```
#####  
# Fit Multiple Regression model with 6 Covariates.  
  
# Fixed Effect = ProdUseNew5  
# zCovariates = ~factor(Ctrl_Local_exhaust_hood)+Distance2+RoomVolume2  
#           +ToolSpray_Wipe+ToolSterlz_Machn+Madge_MeanRH2  
#####  
  
#####  
##### Final multiple regression model with 6 Covariates #####  
  
source("rtxm.R") # Functions that will comprise the package  
  
myModel <- rtxmProfileREffLODsCovariatesModel(  
  ~lnYND,           # Response (Y)  
  ~ProdUseNew5,     # Task (factor variable)  
  theSplineBasis,   # Spline basis object (see above)  
  LOD=data$lnLOD,   # LODs (on same scale as Y)  
  
  zCovariates=~factor(Ctrl_Local_exhaust_hood)+Distance2+RoomVolume2+ToolSpray_Wipe+ToolSterlz_  
  Machn+Madge_MeanRH2,  
  data=data,        # Data set to interpret variables  
  gGroup=~SampleGroupID, # Series (profile) identifier  
  rng.seed=1        # Added Seed to get reproducible estimates  
)  
  
update(myModel,100) # Adaptation  
update(myModel,1000) # Burn-in  
myModel  
  
update(myModel,10000,"$standard",10) # 10000 samples thinned by 10  
myModel  
  
summary(myModel)           # Model summary
```

```

myPredictions <- predict(myModel) # Predictions

ModelResult<-summary(myModel) # Model summary
#str(ModelResult) #Check MdelResult structure or component

##### Added Quantile Estimation Below #####
# Extract chains for specific parameters
taskMean <- getTaskMeans(myModel) # Task-specific means

#### Variance components
epsilonSD <- getVarianceComponents(myModel, "epsilon") # Task specific
zetaSD <- getVarianceComponents(myModel, "zeta") # Time series

#Profile: Used for "REff" Models;
alphaSD <- getVarianceComponents(myModel, "precisionAlpha", precisionToSD=TRUE)

source("rtxmUtilQuantiles.R")

NSIMQUANT <- 1000 # Number of simulations per MCMC sample (should be at least 1000 in real life)
QUANTS <- c(0.01, seq(0.025, 0.975, 0.025), 0.99) # Various quantiles of interest

# Note: these need to match the original data set
HOURSAUTO <- 0.25 # Number of hours over which to calculate aggregate
MINUTESPERSAMP <- 5 # Original number of minutes per sample

# Spline representing consecutive measurements (for Quantiles), centered around 12pm
mySplineQuantiles <- makeProxySpline(HOURSAUTO*60,MINUTESPERSAMP,
                                     knotsDays=myModel@knots,knotsBoundary=myModel@boundary)

#Add statement set.seed(1) to get reproducible Quantiles.
set.seed(1)
resultsQuantile <- getQuantileSeries(NSIMQUANT, taskMean, zetaSD, epsilonSD,
                                     sp=mySplineQuantiles, sigmaA=alphaSD, quants=QUANTS,
                                     transform=exp) # Important: if original scale of data is log, distribution must be un-
logged

#Export Quantile Summary Outputs to CSV Files;
write.csv(apply(resultsQuantile[,,"75"], 2, summary),
          "Corrt2PPBAvg_ProdUseNew5_MultiRegr_6Covar_Qt75.csv")
write.csv(apply(resultsQuantile[,,"95"], 2, summary),
          "Corrt2PPBAvg_ProdUseNew5_MultiRegr_6Covar_Qt95.csv")

```

**Supplementary Table S1:** Characteristic of the real-time PID instruments

|                    | ppbRae 2000                                                                          | ToxiRae PGM-1800                                                                     |
|--------------------|--------------------------------------------------------------------------------------|--------------------------------------------------------------------------------------|
| Sampler Type       | Mobile-area                                                                          | Personal                                                                             |
| Sampling Mode      | Active                                                                               | Passive                                                                              |
| Detection          | Photoionization                                                                      | Photoionization                                                                      |
| Lamp               | 10.6 eV                                                                              | 10.6 eV                                                                              |
| Measurement Range  | <0.1 to 20,000 ppb                                                                   | <0.1 to 1,000 ppm                                                                    |
| Limit of detection | 1.0 ppb                                                                              | 0.1 ppm                                                                              |
| Response Time (s)  | <5                                                                                   | 15 (Isobutene T <sub>90</sub> )                                                      |
| Averaging Time (s) | 10                                                                                   | 10                                                                                   |
| Interferences      | CH <sub>3</sub> (methane),<br>C <sub>2</sub> H <sub>6</sub> (ethane),<br>water vapor | CH <sub>3</sub> (methane),<br>C <sub>2</sub> H <sub>6</sub> (ethane), water<br>vapor |

PID=photoionization detector; TVOC=total volatile organic compound; ppb=parts per billion; ppm=parts per million; (s)=seconds

**Supplementary Table S2:** Posterior distributions of the cTVOC summary statistics for tasks showing: a) mean GM, b) median GM and 95%CI, c) median GSD and 95%CI, and d) median P95 and IQR

| Variable<br>Task           | N                                          | Mean GM<br>(ppb) | Median GM (ppb)<br>(95% CI) | Median GSD<br>(95% CI) | Median P95 (ppb)<br>(IQR) |                     |
|----------------------------|--------------------------------------------|------------------|-----------------------------|------------------------|---------------------------|---------------------|
| Main Fixed Effect of Tasks | No Product Use (Intercept)                 | 7993             | 924                         | 925 (759, 1121)        | 1.34 (1.32, 2.57)         | 8226 (7440, 9091)   |
|                            | Alcohol Skin Wipe                          | 232              | 855                         | 854 (599, 1203)        | 1.96 (1.75, 3.59)         | 9595 (8493, 10940)  |
|                            | Alcohol Surface Cleaning                   | 38               | 986                         | 990 (542, 1795)        | 1.83 (1.48, 3.25)         | 9504 (8032, 11360)  |
|                            | Bleach Surface Cleaning                    | 46               | 969                         | 964 (691, 1403)        | 1.09 (1.05, 1.76)         | 7278 (6372, 8335)   |
|                            | Chlorine Skin Wipe                         | 39               | 1047                        | 1063 (638, 1601)       | 1.27 (1.12, 2.29)         | 8479 (7033, 10070)  |
|                            | Dental Products                            | 9                | 1320                        | 1223 (575, 3741)       | 1.5 (1.15, 3.85)          | 10980 (8580, 15610) |
|                            | Detergent Bathroom Cleaning                | 27               | 911                         | 896 (474, 1782)        | 2.15 (1.59, 3.6)          | 9582 (7831, 11870)  |
|                            | Detergent Instrument Cleaning              | 64               | 851                         | 855 (530, 1393)        | 1.34 (1.22, 2.98)         | 7496 (6465, 8832)   |
|                            | Detergent Skin Cleaning                    | 3                | 694                         | 682 (396, 1246)        | 1.04 (1.02, 1.15)         | 4843 (3745, 6285)   |
|                            | Detergent Surface Cleaning                 | 17               | 1049                        | 990 (658, 2095)        | 1.14 (1.07, 2.98)         | 8513 (7453, 10140)  |
|                            | EA/BA/GE Floor Stripping                   | 206              | 898                         | 902 (605, 1278)        | 1.63 (1.47, 5.42)         | 9761 (8168, 17780)  |
|                            | EA/GE/ Glass Cleaning                      | 62               | 1137                        | 1046 (666, 2141)       | 1.21 (1.12, 2.47)         | 9185 (7763, 11050)  |
|                            | EA/GE Surface Cleaning                     | 51               | 741                         | 970 (290, 1468)        | 1.29 (1.15, 3.21)         | 7703 (4621, 9352)   |
|                            | Enzymatic Cleaning                         | 149              | 1260                        | 1080 (744, 2401)       | 1.2 (1.14, 2.27)          | 9852 (8254, 12630)  |
|                            | Formaldehyde in Laboratory                 | 26               | 398                         | 387 (197, 875)         | 1.43 (1.23, 2.06)         | 3172 (2220, 4402)   |
|                            | HLD on Instruments                         | 40               | 1102                        | 1094 (581, 2207)       | 2.14 (1.65, 4.17)         | 12180 (9865, 15710) |
|                            | Iodine Skin Wipe                           | 36               | 717                         | 701 (417, 1355)        | 1.63 (1.22, 4.09)         | 6946 (5697, 9275)   |
|                            | Non Cleaning-Other Product                 | 192              | 830                         | 846 (558, 1185)        | 1.41 (1.28, 2.79)         | 7452 (6642, 8403)   |
|                            | Non Cleaning-Dialysis Buffer               | 7                | 1098                        | 1063 (563, 2419)       | 1.25 (1.09, 3.28)         | 8877 (7523, 10760)  |
|                            | Non Cleaning-Lab Reagent                   | 28               | 1204                        | 1174 (641, 2345)       | 1.26 (1.14, 1.96)         | 9255 (7877, 10780)  |
|                            | Non Cleaning-Medications                   | 63               | 866                         | 875 (524, 1345)        | 1.48 (1.23, 3.72)         | 8473 (7328, 10040)  |
|                            | Phenolics Products                         | 109              | 876                         | 885 (582, 1251)        | 1.22 (1.16, 2.77)         | 7656 (6786, 8655)   |
|                            | Quats Bathroom Cleaning                    | 14               | 635                         | 670 (253, 1227)        | 1.19 (1.1, 5.79)          | 6318 (5164, 7985)   |
| Quats Floor Cleaning       | 346                                        | 960              | 955 (722, 1307)             | 1.14 (1.11, 1.62)      | 7180 (6301, 8150)         |                     |
| Quats Skin Wipe            | 23                                         | 2112             | 2091 (943, 4766)            | 1.45 (1.22, 2.42)      | 17360 (13850, 22040)      |                     |
| Quats Surface Cleaning     | 450                                        | 1005             | 984 (726, 1469)             | 1.45 (1.36, 2.93)      | 9337 (8196, 10920)        |                     |
| Solvent Products           | 6                                          | 953              | 1024 (347, 2083)            | 1.27 (1.08, 5.23)      | 8924 (7338, 11080)        |                     |
| SD                         | Spline ( $\sigma_i$ ): Median (95%CI)      |                  |                             | 1.2 (0.03, 1.23)       |                           |                     |
|                            | Random ( $\sigma_\alpha$ ): Median (95%CI) |                  |                             | 1.02 (0.91, 1.17)      |                           |                     |

cTVOC=corrected TVOC concentrations; N= number of 5 minute measurements; GM=geometric mean; GSD=geometric standard deviation; CI=credible intervals; IQR=inter-quartile range; ppb=parts per billion; EA/BA/GE= ethanolamines/benzyl alcohols/glycol ethers; EA/GE=ethanolamines/glycol ethers; HLD=high-level disinfectants; Quats=quaternary ammonium compounds; SD=standard deviations; model parameters are exponentiated to get GM, GSD, P95.

**Supplementary Table S3:** Models summaries showing distributions of one time-invariant or time-varying covariate in models that included the main fixed effect of task

| Time-Invariant Covariates                        | Mean ( $\beta$ )<br>(% Change) | Median ( $\beta$ )<br>(% Change) | 95% CI ( $\beta$ ) | Time-Varying Covariates                          | Mean ( $\beta$ )<br>(% Change) | Median ( $\beta$ )<br>(% Change) | 95% CI ( $\beta$ ) |
|--------------------------------------------------|--------------------------------|----------------------------------|--------------------|--------------------------------------------------|--------------------------------|----------------------------------|--------------------|
| <b>Model task and one covariate (occupation)</b> |                                |                                  |                    | <b>Model task and one time varying covariate</b> |                                |                                  |                    |
| Clinical Lab Techs (Reference)                   |                                |                                  |                    | <b>Air Changes per Hour</b>                      |                                |                                  |                    |
| Nursing Assistants                               | 1.52 (355.6)                   | 1.5 (347.4)                      | 0.61, 2.24         | ≤ 10 (Reference)                                 |                                |                                  |                    |
| Dental Assistants                                | 2.34 (940.1)                   | 2.34 (942.1)                     | 1.29, 3.3          | > 10                                             | 0.08 (8.8)                     | 0.08 (8.7)                       | 0, 0.17            |
| Dental Lab Techs                                 | 0.71 (103.5)                   | 0.71 (102.6)                     | -0.1, 1.36         | N/A                                              | 0.02 (2.1)                     | 0.02 (2)                         | -0.06, 0.09        |
| Endoscopy Techs                                  | 0.83 (129.7)                   | 0.9 (146)                        | 0.01, 1.44         | <b>General Ventilation</b>                       |                                |                                  |                    |
| Floor Strippers/Waxers                           | 0.47 (60.7)                    | 0.47 (60)                        | -0.29, 1.04        | Absent (Reference)                               |                                |                                  |                    |
| Housekeepers                                     | 1.39 (302.6)                   | 1.42 (312.9)                     | 0.9, 1.68          | Present                                          | 0.04 (3.6)                     | 0.03 (2.7)                       | -0.07, 0.19        |
| Licensed Pract Nurses                            | 2.27 (864.5)                   | 2.25 (847.6)                     | 1.4, 3.16          | N/A                                              | -0.01 (-0.6)                   | -0.01 (-0.5)                     | -0.06, 0.05        |
| Med Equipment Preparers                          | 0.85 (134.7)                   | 0.92 (150.4)                     | -0.05, 1.42        | <b>Local Exhaust Hood</b>                        |                                |                                  |                    |
| Pharmacy Techs                                   | 1.41 (309.7)                   | 1.39 (303.3)                     | 0.62, 2.25         | Absent (Reference)                               |                                |                                  |                    |
| Registered Nurses                                | 1.34 (281.5)                   | 1.44 (321.8)                     | 0.81, 1.64         | Present                                          | -0.11 (-10.7)                  | -0.15 (-14.1)                    | -0.35, 0.23        |
| Respiratory Therapists                           | 1.26 (252.6)                   | 1.27 (256.8)                     | 0.12, 2.3          | N/A                                              | 0 (-0.5)                       | 0 (-0.5)                         | -0.07, 0.05        |
| Surgical Technologists                           | -0.09 (-8.5)                   | -0.13 (-12.2)                    | -1.32, 1.43        | <b>Automatic Sterilizer</b>                      |                                |                                  |                    |
| <b>Model task and one covariate (hospital)</b>   |                                |                                  |                    | No (Reference)                                   |                                |                                  |                    |
| VA Hospital 1 (Reference)                        |                                |                                  |                    | Yes                                              | -0.42 (-34.1)                  | -0.4 (-32.7)                     | -0.84, -0.06       |
| VA Hospital 2                                    | -0.95 (-61.4)                  | -0.86 (-57.5)                    | -1.59, -0.66       | N/A                                              | -0.2 (-18.2)                   | -0.19 (-17.4)                    | -0.42, -0.05       |
| University Hospital 1                            | -0.04 (-3.5)                   | 0.03 (3.2)                       | -0.81, 0.36        | <b>Tool Mop Use</b>                              |                                |                                  |                    |
| University Hospital 2                            | -0.46 (-37.1)                  | -0.47 (-37.7)                    | -0.92, -0.04       | No mop use (Reference)                           |                                |                                  |                    |
| <b>Model task and one covariate (unit)</b>       |                                |                                  |                    | Regular mop                                      |                                |                                  |                    |
| Critical Care (Reference)                        |                                |                                  |                    | Micro fiber mop                                  | -0.02 (-2)                     | -0.02 (-2.1)                     | -0.14, 0.1         |
| Clinical Laboratory                              | -1.27 (-72)                    | -1.3 (-72.7)                     | -1.78, -0.55       | N/A                                              | 0.05 (4.8)                     | -0.01 (-0.8)                     | -0.15, 0.35        |
| Dental Clinic                                    | 0.32 (38.2)                    | 0.23 (25.4)                      | -0.63, 1.29        | <b>Sampler Distance</b>                          |                                |                                  |                    |
| Dental Laboratory                                | -0.83 (-56.2)                  | -0.82 (-55.8)                    | -1.78, 0.02        | ≤ 3 feet (Reference)                             |                                |                                  |                    |
| Dialysis                                         | -1.39 (-75.1)                  | -1.46 (-76.8)                    | -2.01, -0.48       | > 3 feet                                         | -0.01 (-0.6)                   | -0.01 (-0.6)                     | -0.06, 0.04        |
| Emergency Room                                   | -0.1 (-9.6)                    | -0.11 (-10.8)                    | -0.77, 0.87        | <b>Product Amount</b>                            |                                |                                  |                    |
| Floor                                            | -1.01 (-63.7)                  | -1.04 (-64.7)                    | -1.55, -0.22       | Small (Reference)                                |                                |                                  |                    |
| OR/GI                                            | -0.26 (-23.2)                  | -0.29 (-25.5)                    | -0.57, 0.17        | Large                                            | -0.1 (-9.4)                    | -0.09 (-8.4)                     | -0.27, 0.01        |
| Pharmacy                                         | -0.23 (-20.5)                  | -0.19 (-17.5)                    | -1.02, 0.48        | Non-Cleaning Product                             | -0.03 (-2.5)                   | -0.03 (-2.5)                     | -0.13, 0.09        |
| Central Supply                                   | -1.29 (-72.4)                  | -1.34 (-73.9)                    | -1.89, -0.4        | N/A                                              | -0.96 (-61.5)                  | -1.01 (-63.8)                    | -1.32, 0.03        |

|                                                  |              |               |              |                      |               |               |              |
|--------------------------------------------------|--------------|---------------|--------------|----------------------|---------------|---------------|--------------|
| Ward                                             | -0.36 (-30)  | -0.37 (-30.7) | -0.97, 0.18  | <b>Room Pressure</b> |               |               |              |
| <b>Model task and one time-varying covariate</b> |              |               |              | Positive (Reference) |               |               |              |
| <b>Tool Spray &amp; Sponge</b>                   |              |               |              | Negative             | 0 (-0.4)      | -0.02 (-1.5)  | -0.13, 0.14  |
| No Tool Used (Reference)                         |              |               |              | N/A                  | -0.03 (-2.6)  | -0.03 (-2.8)  | -0.09, 0.04  |
| Sponge only                                      | 0.01 (0.8)   | 0.02 (1.8)    | -0.1, 0.09   | <b>Room Volume</b>   |               |               |              |
| Spray only                                       | 0.19 (20.7)  | 0.16 (17.5)   | -0.05, 0.57  | Small (Reference)    |               |               |              |
| Sponge and Spray                                 | 0.06 (5.9)   | 0.06 (5.9)    | -0.06, 0.19  | Large                | -0.11 (-10.6) | -0.11 (-10.4) | -0.22, -0.01 |
| N/A                                              | -0.05 (-4.7) | -0.01 (-0.7)  | -0.27, 0.07  | N/A                  | -0.1 (-9.9)   | -0.1 (-9.8)   | -0.2, -0.02  |
| <b>Humidity</b>                                  |              |               |              | <b>Temperature</b>   |               |               |              |
| % Relative Humidity                              | -0.01 (-1.1) | -0.01 (-1.1)  | -0.02, -0.01 | °Celsius             | 0.05 (5.6)    | 0.06 (6.5)    | 0.01, 0.08   |

cTVOC= corrected TVOC concentrations; N=number of 5-minute average measurements;  $\beta$ =posterior parameter for covariates; CI=credible intervals; %change=  $(\exp(\beta)-1)*100\%$  for covariates; N/A=variable not relevant.

**Supplementary Table S4:** Posterior distributions of the GM, P95, and the GSD of cTVOC exposures in ppb for selected a) patient cleaning, b) surface cleaning and c) instrument cleaning task-occupation combinations

| Task-Occupation            | N   | Mean GM | Median GM | GM 95% CI | Median GM Rank | Mean P95 | Median P95 | P95 IQR      | Median P95 Rank | Median GSD Rank | Median GSD and 95% CI |
|----------------------------|-----|---------|-----------|-----------|----------------|----------|------------|--------------|-----------------|-----------------|-----------------------|
| <b>Patient Cleaning</b>    |     |         |           |           |                |          |            |              |                 |                 |                       |
| AlcohSkinPrep_CNA          | 40  | 1698    | 1696      | 590, 4507 | 5              | 13220    | 12640      | 10310, 15460 | 6               | 22              | 1.13 (1.08, 2.33)     |
| AlcohSkinPrep_ET/MEP       | 18  | 667     | 591       | 189, 4097 | 25             | 14720    | 8200       | 5797, 15340  | 18              | 3               | 2.93 (1.94, 6.96)     |
| AlcohSkinPrep_PHT          | 15  | 748     | 728       | 185, 3039 | 21             | 13040    | 10190      | 6981, 15690  | 7               | 2               | 2.96 (1.97, 6.05)     |
| AlcohSkinPrep_RN           | 137 | 964     | 951       | 362, 2249 | 18             | 8805     | 8577       | 7476, 9911   | 15              | 9               | 1.56 (1.41, 3.43)     |
| AlcohSkinPrep_RT           | 10  | 2282    | 2323      | 524, 8932 | 1              | 54250    | 35510      | 22390, 57390 | 1               | 1               | 3.24 (2.19, 7.45)     |
| ChlorSkinPrep_CNA          | 13  | 2222    | 2255      | 603, 6406 | 2              | 17900    | 17250      | 11730, 22250 | 2               | 16              | 1.3 (1.13, 1.93)      |
| ChlorSkinPrep_RN           | 16  | 1258    | 1230      | 479, 3250 | 10             | 9438     | 9271       | 7572, 10950  | 10              | 26              | 1.09 (1.06, 2.17)     |
| IodineSkinPrep_RN          | 36  | 794     | 786       | 319, 2013 | 20             | 7483     | 6933       | 5738, 8464   | 21              | 10              | 1.51 (1.22, 3.94)     |
| QuatsSkinPrep_Nursing      | 25  | 2021    | 1971      | 730, 6195 | 3              | 16340    | 15470      | 12520, 19070 | 4               | 14              | 1.36 (1.19, 2.46)     |
| <b>Surface Cleaning</b>    |     |         |           |           |                |          |            |              |                 |                 |                       |
| AlcohSurfClnr_DLT          | 31  | 1196    | 1255      | 326, 2882 | 8              | 9452     | 9002       | 7010, 11480  | 12              | 19              | 1.2 (1.13, 2.2)       |
| BleachSurfClnr_HK          | 33  | 1068    | 1037      | 494, 2880 | 15             | 7482     | 7332       | 6544, 8224   | 20              | 25              | 1.1 (1.04, 1.48)      |
| BleachSurfClnr_RN          | 9   | 1072    | 1138      | 312, 2862 | 12             | 8268     | 8588       | 6027, 10450  | 14              | 30              | 1.05 (1.03, 1.83)     |
| DetgtBathClnr_HK/FSW       | 30  | 973     | 956       | 380, 2757 | 17             | 9610     | 8924       | 7465, 11070  | 13              | 6               | 1.93 (1.51, 3.32)     |
| DetgtSurfClnr_HK           | 17  | 1163    | 1122      | 513, 3433 | 13             | 9214     | 8497       | 7531, 9871   | 16              | 29              | 1.08 (1.05, 2.89)     |
| EA_BA_GEFlrStrip_FSW       | 205 | 616     | 630       | 236, 1332 | 22             | 6948     | 6006       | 5030, 7999   | 23              | 8               | 1.62 (1.44, 5.21)     |
| EA_GEGlassClnr_HK          | 58  | 1246    | 1164      | 528, 4026 | 11             | 9858     | 9100       | 7707, 11180  | 11              | 17              | 1.24 (1.14, 2.46)     |
| EA_GESurfClnr_FSW          | 20  | 246     | 310       | 38, 792   | 30             | 2198     | 2331       | 1040, 2955   | 30              | 28              | 1.09 (1.06, 1.9)      |
| EA_GESurfClnr_HK           | 31  | 1264    | 1284      | 543, 2610 | 7              | 9528     | 9538       | 7781, 11110  | 9               | 12              | 1.4 (1.25, 1.67)      |
| QuatsBathClnr_HK           | 14  | 834     | 871       | 268, 1949 | 19             | 7814     | 6916       | 5888, 8319   | 22              | 21              | 1.16 (1.09, 4.54)     |
| QuatsFlrClnr_HK/FSW        | 346 | 1102    | 1106      | 533, 2691 | 14             | 7874     | 7777       | 6940, 8689   | 19              | 23              | 1.13 (1.11, 1.6)      |
| QuatsSurfClnr_DA           | 27  | 1943    | 1876      | 619, 7006 | 4              | 17890    | 16560      | 13140, 20740 | 3               | 7               | 1.78 (1.45, 2.62)     |
| QuatsSurfClnr_ET/MEP       | 48  | 1389    | 1311      | 473, 5279 | 6              | 29660    | 13820      | 10330, 25440 | 5               | 5               | 2.02 (1.53, 8.62)     |
| QuatsSurfClnr_HK/FSW       | 360 | 1030    | 1034      | 493, 2512 | 16             | 8460     | 8317       | 7392, 9331   | 17              | 11              | 1.45 (1.37, 2.58)     |
| QuatsSurfClnr_RN           | 11  | 1363    | 1244      | 487, 5785 | 9              | 12300    | 9723       | 8044, 12880  | 8               | 18              | 1.23 (1.09, 3.44)     |
| <b>Instrument Cleaning</b> |     |         |           |           |                |          |            |              |                 |                 |                       |



|                      |    |     |     |           |    |      |      |            |    |    |                   |
|----------------------|----|-----|-----|-----------|----|------|------|------------|----|----|-------------------|
| DetgtInstClnr_ET/MEP | 61 | 470 | 454 | 177, 1506 | 28 | 4070 | 3742 | 3053, 4579 | 28 | 15 | 1.35 (1.17, 3.02) |
| EnzymeClnr_ET        | 79 | 641 | 602 | 255, 2241 | 23 | 5308 | 4788 | 3924, 6018 | 25 | 19 | 1.22 (1.15, 2.68) |
| EnzymeClnr_MEP       | 68 | 646 | 587 | 233, 3069 | 26 | 4979 | 4475 | 3690, 5530 | 26 | 24 | 1.11 (1.08, 1.94) |
| HLD_Prod_ET          | 40 | 629 | 600 | 227, 2293 | 24 | 7190 | 6004 | 4783, 8166 | 24 | 4  | 2.04 (1.65, 3.96) |
| PhenoProd_ET         | 20 | 541 | 542 | 191, 1409 | 27 | 4302 | 4203 | 3471, 4997 | 27 | 13 | 1.38 (1.2, 2.33)  |
| PhenoProd_MEP        | 32 | 315 | 324 | 99, 765   | 29 | 2535 | 2441 | 2039, 2907 | 29 | 27 | 1.09 (1.07, 2.91) |

N= number of 5-minute average measurements; GM=geometric mean; ppb=parts per billion; P95=95<sup>th</sup> percentile; GSD=geometric standard deviation; CI=credible intervals; IQR=inter-quartile range; CNA=certified nursing assistant; ET=endoscopy technician; MEP=medical equipment preparer; PHT=pharmacy technician; RN=registered nurse; RT=respiratory therapist; DLT=dental laboratory technician; HK=housekeeper; FSW=floor stripper/waxer; DA=dental assistant

**Supplementary Table S5:** Distributions of the GM, P95, and the GSD of cTVOC concentrations for selected a) patient cleaning, b) surface cleaning and c) instrument cleaning task-unit combinations

| Task-Unit                | N   | Mean GM | Median GM | GM 95% CI | Median GM Rank | Mean P95 | Median P95 | P95 IQR      | Median P95 Rank | Median GSD Rank | Median GSD and 95% CI |
|--------------------------|-----|---------|-----------|-----------|----------------|----------|------------|--------------|-----------------|-----------------|-----------------------|
| <b>Patient Cleaning</b>  |     |         |           |           |                |          |            |              |                 |                 |                       |
| AlcohSkinPrep_CC         | 28  | 935     | 919       | 472, 2177 | 27             | 10860    | 8101       | 6667, 11700  | 24              | 15              | 1.38 (1.16, 5.23)     |
| AlcohSkinPrep_DIALYSIS   | 7   | 283     | 287       | 56, 1190  | 43             | 7438     | 2600       | 1882, 3769   | 40              | 16              | 1.38 (1.15, 8.31)     |
| AlcohSkinPrep_FLOOR/WARD | 30  | 1073    | 1080      | 381, 3137 | 17             | 14380    | 13250      | 10410, 17040 | 5               | 2               | 2.57 (1.91, 4.57)     |
| AlcohSkinPrep_OR GI      | 135 | 1091    | 1065      | 546, 2445 | 20             | 10960    | 10610      | 9083, 12530  | 10              | 6               | 1.84 (1.59, 3.31)     |
| AlcohSkinPrep_PHRAMACY   | 15  | 608     | 598       | 147, 2842 | 34             | 11870    | 8867       | 5770, 13810  | 16              | 1               | 3.05 (1.96, 6.08)     |
| AlcohSkinPrep_SPD        | 11  | 744     | 720       | 258, 2657 | 32             | 8121     | 6943       | 4579, 9530   | 32              | 11              | 1.48 (1.13, 4.62)     |
| ChlorSkinPrep_CC         | 13  | 1269    | 1264      | 594, 2953 | 11             | 9923     | 9715       | 7435, 12010  | 13              | 19              | 1.3 (1.13, 1.95)      |
| ChlorSkinPrep_DIALYSIS   | 14  | 402     | 376       | 168, 1699 | 38             | 3228     | 2858       | 2236, 3659   | 38              | 32              | 1.12 (1.07, 2.14)     |
| ChlorSkinPrep_OR GI      | 8   | 1113    | 1317      | 191, 3734 | 9              | 10540    | 10150      | 7529, 13080  | 11              | 28              | 1.14 (1.05, 4.15)     |
| IodineSkinPrep_CC        | 8   | 772     | 772       | 158, 3977 | 31             | 18380    | 9380       | 6090, 17560  | 15              | 3               | 2.07 (1.3, 13.45)     |
| IodineSkinPrep_ER        | 21  | 1144    | 1135      | 476, 2959 | 14             | 8748     | 8494       | 6856, 10370  | 20              | 25              | 1.2 (1.12, 1.8)       |
| QuatsSkinPrep_WARD       | 23  | 2148    | 2119      | 852, 5898 | 2              | 18270    | 16940      | 13360, 22140 | 3               | 12              | 1.45 (1.23, 2.46)     |
| <b>Surface Cleaning</b>  |     |         |           |           |                |          |            |              |                 |                 |                       |
| AlcohSurfClnr_DENTAL LAB | 31  | 961     | 1058      | 145, 3740 | 21             | 8623     | 8162       | 5067, 11210  | 23              | 24              | 1.21 (1.13, 2.26)     |
| BleachSurfClnr_DIALYSIS  | 9   | 351     | 351       | 98, 1063  | 39             | 2759     | 2602       | 1949, 3375   | 39              | 38              | 1.07 (1.04, 1.85)     |
| BleachSurfClnr_ER        | 28  | 1130    | 1110      | 520, 2679 | 15             | 8166     | 7839       | 6638, 9494   | 27              | 35              | 1.08 (1.04, 1.45)     |
| BleachSurfClnr_WARD      | 7   | 1039    | 1079      | 377, 2787 | 18             | 7955     | 7981       | 5007, 10050  | 25              | 37              | 1.07 (1.03, 1.34)     |
| DetgtBathClnr_DIALYSIS   | 6   | 324     | 311       | 115, 1337 | 42             | 2791     | 2372       | 1822, 3206   | 43              | 27              | 1.14 (1.06, 2.84)     |
| DetgtBathClnr_WARD       | 14  | 1040    | 1053      | 468, 2530 | 22             | 7592     | 7375       | 6239, 8635   | 29              | 40              | 1.06 (1.04, 1.66)     |
| DetgtSurfClnr_OR GI      | 12  | 1403    | 1290      | 608, 4633 | 10             | 11890    | 9991       | 8304, 13210  | 12              | 36              | 1.08 (1.05, 2.73)     |
| EA_BA_GEFIrStrip_FLOOR   | 205 | 580     | 573       | 216, 1582 | 35             | 7290     | 6207       | 4523, 8715   | 34              | 10              | 1.63 (1.45, 5.24)     |
| EA_GEGlassClnr_DIALYSIS  | 8   | 370     | 340       | 143, 2095 | 40             | 2827     | 2492       | 1914, 3229   | 41              | 42              | 1.04 (1.02, 1.24)     |
| EA_GEGlassClnr_WARD      | 49  | 1360    | 1343      | 645, 3217 | 8              | 11600    | 11040      | 9226, 13550  | 9               | 14              | 1.4 (1.26, 2.72)      |
| EA_GESurfClnr_FLOOR      | 20  | 243     | 312       | 34, 1099  | 41             | 2366     | 2380       | 709.9, 3360  | 42              | 34              | 1.1 (1.05, 1.89)      |
| EA_GESurfClnr_WARD       | 31  | 1220    | 1255      | 477, 3151 | 12             | 9793     | 9649       | 6725, 12230  | 14              | 13              | 1.42 (1.26, 1.7)      |
| PhenoProd_WARD           | 12  | 992     | 1014      | 418, 2552 | 25             | 7342     | 7123       | 5452, 8990   | 31              | 43              | 1.04 (1.03, 1.43)     |

|                            |     |      |      |            |    |       |       |              |    |    |                   |
|----------------------------|-----|------|------|------------|----|-------|-------|--------------|----|----|-------------------|
| QuatsBathClnr_WARD         | 12  | 772  | 834  | 188, 2276  | 30 | 8694  | 7247  | 5721, 9097   | 30 | 21 | 1.26 (1.14, 5.84) |
| QuatsFlrClnr_CC            | 65  | 1046 | 1032 | 632, 1962  | 24 | 7607  | 7511  | 6442, 8618   | 28 | 30 | 1.13 (1.08, 1.5)  |
| QuatsFlrClnr_FLOOR/WARD    | 202 | 1088 | 1085 | 528, 2599  | 16 | 8169  | 7853  | 6430, 9445   | 26 | 31 | 1.12 (1.1, 1.7)   |
| QuatsFlrClnr_OR GI         | 79  | 1172 | 1146 | 603, 2617  | 13 | 8569  | 8359  | 7227, 9740   | 21 | 26 | 1.16 (1.11, 1.55) |
| QuatsSurfClnr_CC           | 43  | 973  | 951  | 544, 2060  | 26 | 8732  | 8328  | 7171, 9814   | 22 | 9  | 1.7 (1.46, 2.64)  |
| QuatsSurfClnr_DENTAL       | 27  | 2333 | 2158 | 887, 11360 | 1  | 23230 | 19590 | 15880, 25110 | 2  | 7  | 1.81 (1.47, 2.69) |
| QuatsSurfClnr_DIALYSIS     | 38  | 415  | 378  | 173, 2442  | 37 | 3364  | 2885  | 2128, 3775   | 37 | 39 | 1.06 (1.05, 1.74) |
| QuatsSurfClnr_ER           | 71  | 1038 | 1069 | 345, 2360  | 19 | 8767  | 8562  | 7103, 10150  | 19 | 18 | 1.3 (1.21, 2.74)  |
| QuatsSurfClnr_FLOOR        | 9   | 702  | 717  | 239, 2105  | 33 | 5319  | 4892  | 3787, 6534   | 35 | 41 | 1.05 (1.03, 1.56) |
| QuatsSurfClnr_OR GI        | 100 | 1460 | 1411 | 741, 3498  | 4  | 11490 | 11080 | 9507, 12950  | 7  | 22 | 1.23 (1.18, 2.18) |
| QuatsSurfClnr_SPD          | 45  | 2056 | 2083 | 645, 7164  | 3  | 42080 | 27700 | 16830, 47870 | 1  | 5  | 1.99 (1.51, 9.17) |
| QuatsSurfClnr_WARD         | 117 | 905  | 896  | 422, 2218  | 28 | 9123  | 8795  | 7397, 10530  | 17 | 8  | 1.75 (1.53, 3.69) |
| <b>Instrument Cleaning</b> |     |      |      |            |    |       |       |              |    |    |                   |
| DetgtInstClnr_OR GI        | 57  | 1071 | 1043 | 510, 2630  | 23 | 9368  | 8732  | 7336, 10760  | 18 | 20 | 1.28 (1.2, 2.98)  |
| EnzymeClnr_OR GI           | 81  | 1481 | 1403 | 742, 4014  | 5  | 12510 | 11260 | 9333, 14350  | 6  | 23 | 1.21 (1.15, 2.65) |
| EnzymeClnr_SPD             | 68  | 897  | 895  | 334, 3012  | 29 | 7282  | 6780  | 4885, 8773   | 33 | 29 | 1.13 (1.09, 1.98) |
| HLD_Prod_OR GI             | 40  | 1384 | 1360 | 603, 3781  | 6  | 16090 | 14400 | 11360, 18810 | 4  | 4  | 2.07 (1.66, 4.12) |
| PhenoProd_OR GI            | 62  | 1391 | 1357 | 692, 3218  | 7  | 11730 | 11060 | 9591, 13150  | 8  | 17 | 1.32 (1.2, 2.74)  |
| PhenoProd_SPD              | 32  | 411  | 461  | 86, 1604   | 36 | 3815  | 3382  | 2214, 4983   | 36 | 33 | 1.11 (1.08, 2.9)  |

N= number of 5-minute average measurements; GM=geometric mean; ppb=parts per billion; P95=95<sup>th</sup> percentile; GSD=geometric standard deviation; CI=credible intervals; IQR=inter-quartile range; CC=Critical Care; OR GI=Operating room/gastroenterology; SPD= central supply; ER=Emergency Room

**Supplementary Table S6:** Proportions of the 14 quantified VOCs and their instrument response correction factors.

| VOC                 | Proportion (range) | Correction Factor |
|---------------------|--------------------|-------------------|
| Ethanol             | 0 - 0.97           | 9.6               |
| Acetone             | 0.002 - 0.997      | 0.9               |
| 2-propanol          | 0 - 0.998          | 4.6               |
| Methylene chloride  | 0 - 0.008          | 1 (default)       |
| Hexane              | 0 - 0.009          | 4.3               |
| Chloroform          | 0 - 0.002          | 1 (default)       |
| Benzene             | 0 - 0.010          | 0.47              |
| Methyl methacrylate | 0 - 0.018          | 1.5               |
| Toluene             | 0 - 0.037          | 0.45              |
| Ethylbenzene        | 0 - 0.020          | 0.65              |
| m,p-xylene          | 0 - 0.089          | 0.44/0.39         |
| o-xylene            | 0 - 0.023          | 0.45              |
| $\alpha$ -pinene    | 0 - 0.003          | 0.31              |
| d-limonene          | 0 - 0.12           | 0.33              |

Default of 1 is used when the response correction factor is not provided by the manufacturer (Rae Systems Inc)

**Supplementary Figure S1:** Pictures of mobile-area and personal samplers used in the survey.

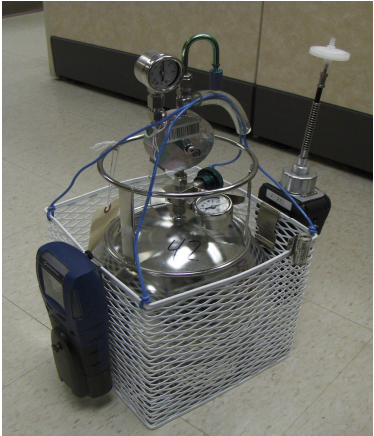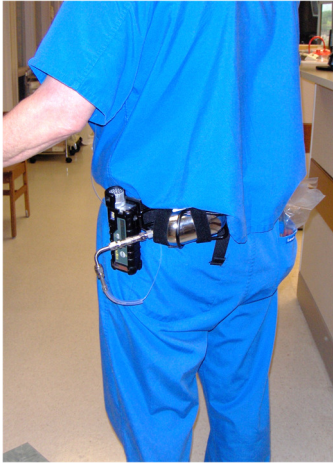

**Supplementary Figure S2:** Panel of 3 plots of correlation between personal and mobile-area TVOC measurements for a) time-integrated, full-shift canister measurements, b) real-time, five-minute average PID measurements, and c) time-integrated, full-shift PID measurements

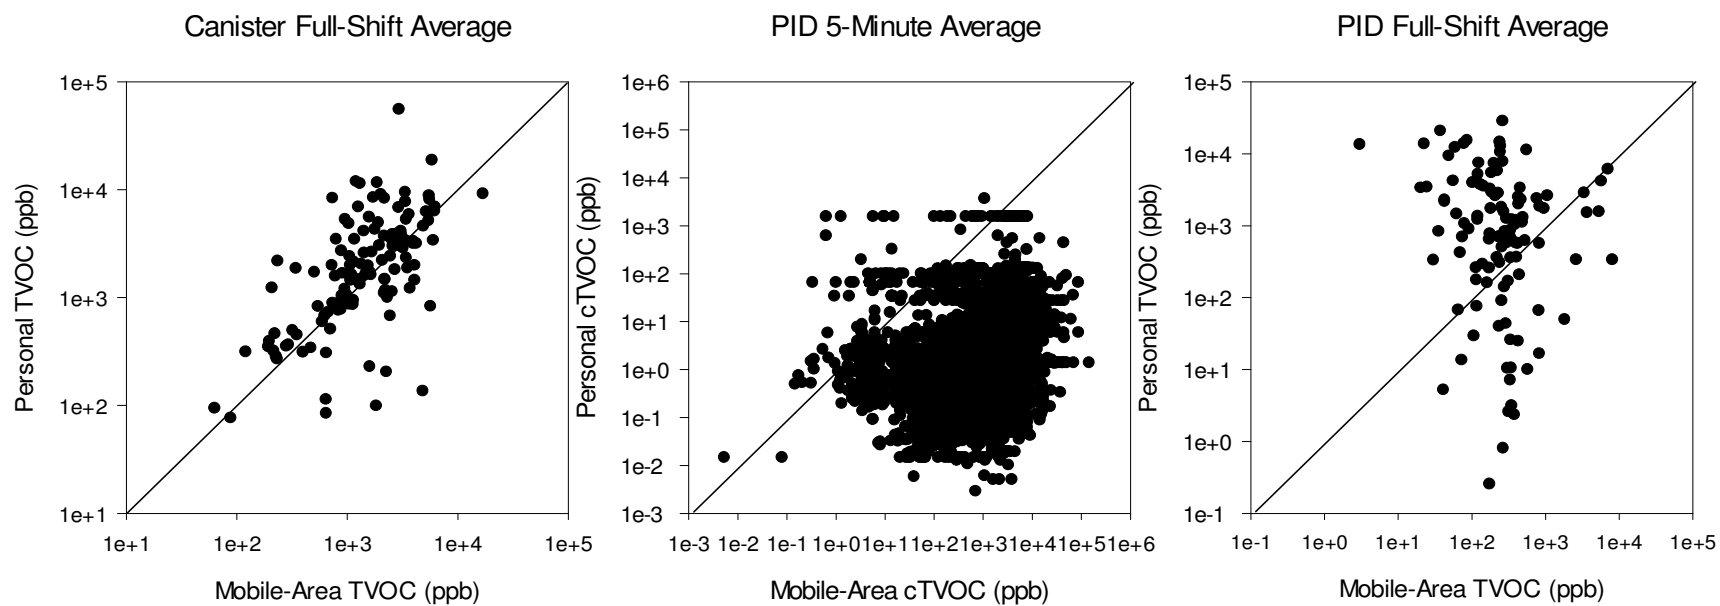

**Supplementary Figure S3:** Heat map of the mean GM cTVOC concentration for selected tasks evaluating the effect of: a) occupations, and b) hospital units

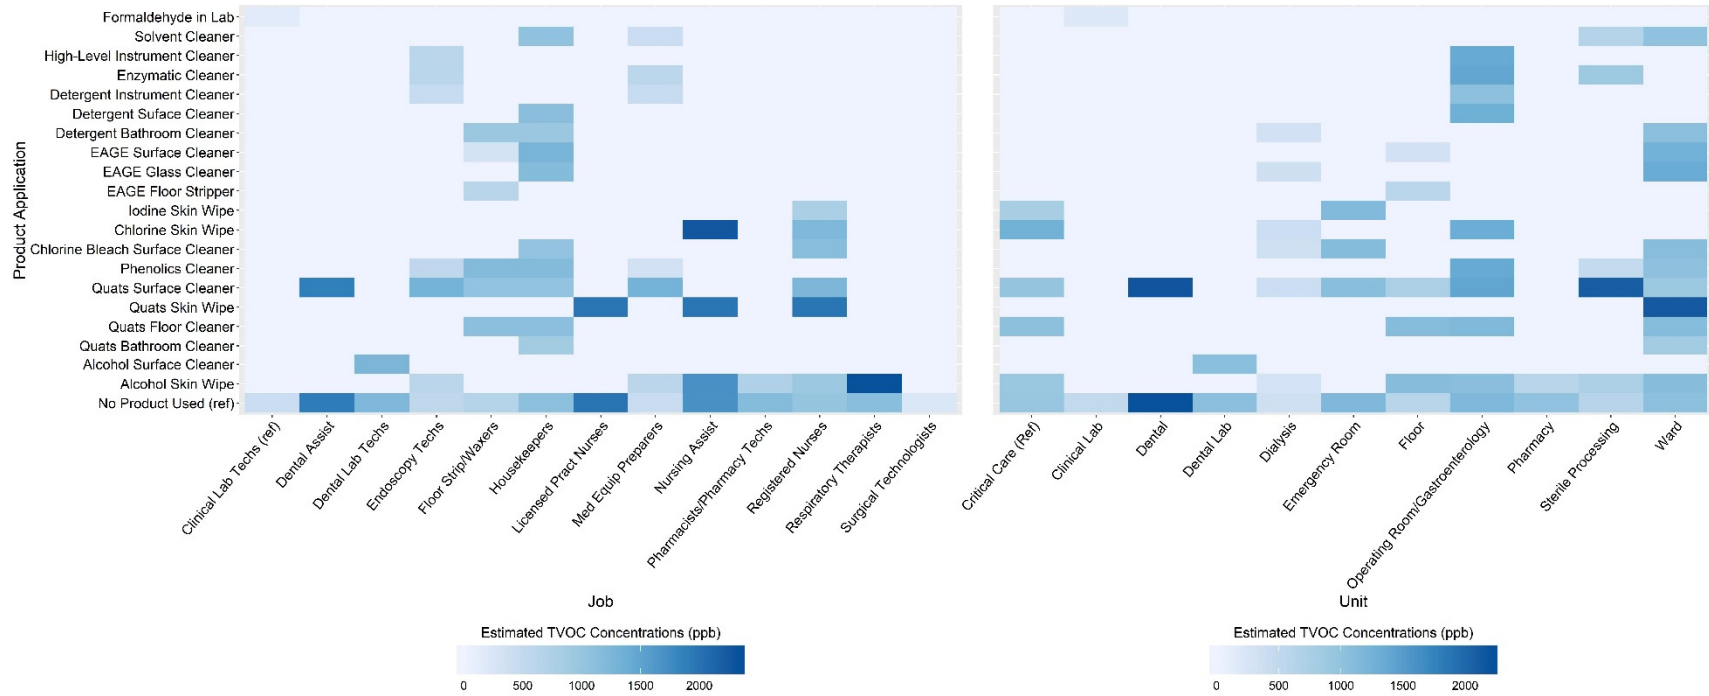

**Supplementary Figure S4:** Distributions of the GM (top panels) and 95<sup>th</sup> percentiles (bottom panels) of cTVOC concentrations for selected a) patient cleaning (left panels), b) surface cleaning (center panels) and c) instrument cleaning (right panels) task-unit combinations;

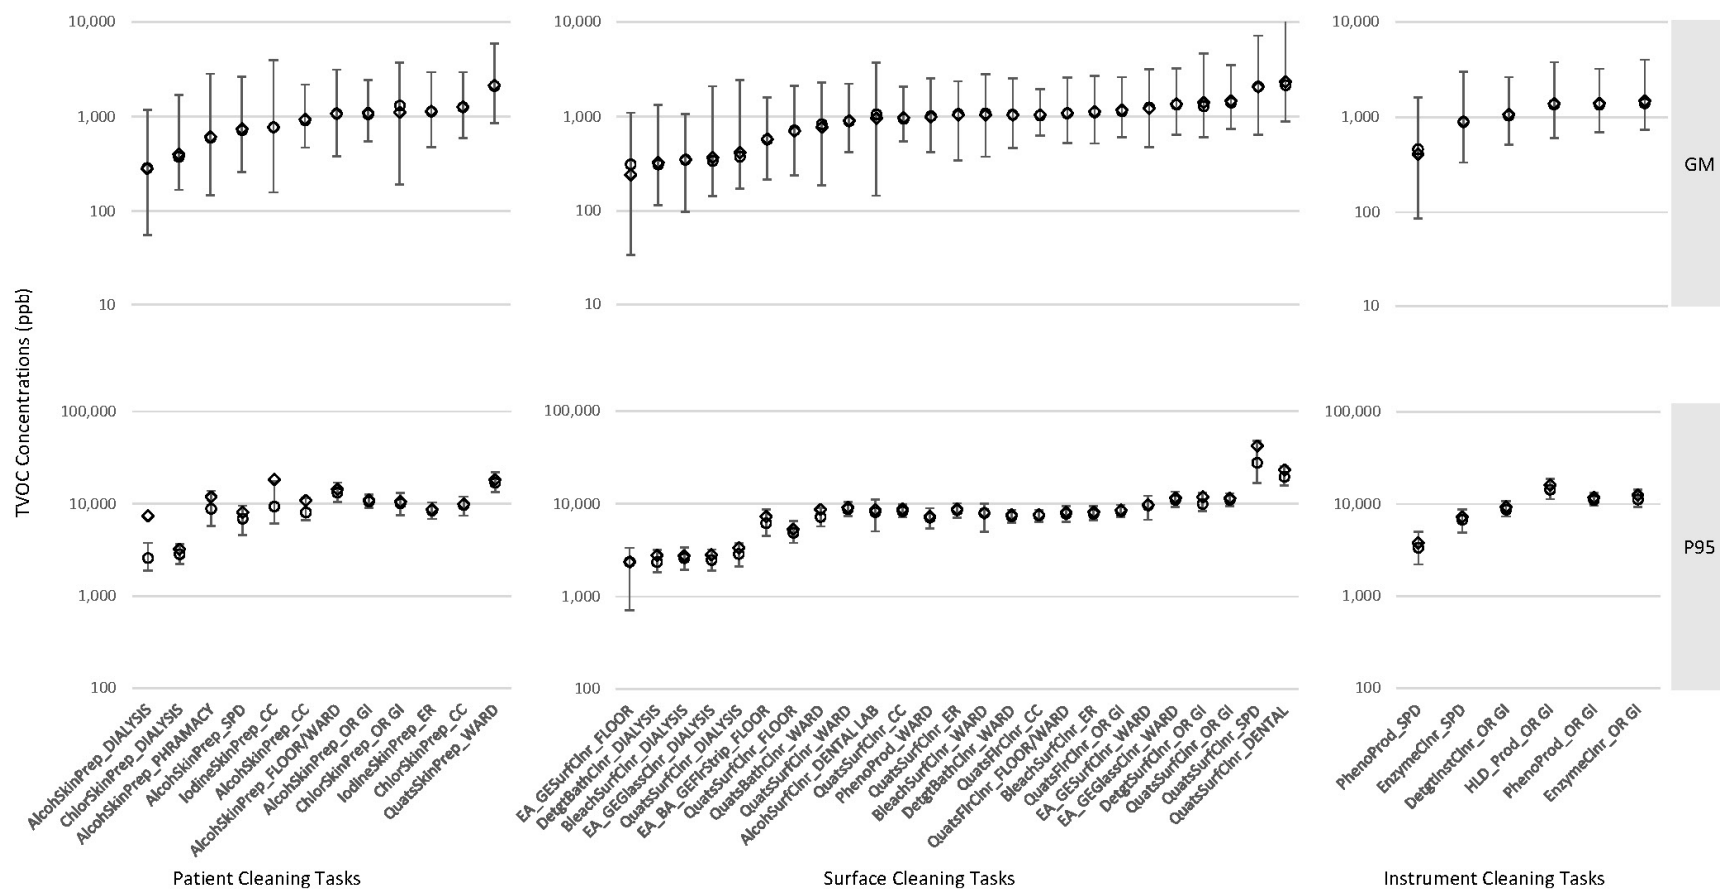

Open diamond=mean; open circle=median; intervals around the GM are 95% Credible Intervals; intervals around the P95 are Inter Quartile Range (25-75%); model parameters are exponentiated to get GM and P95; CC=Critical Care; OR GI=Operating room/gastroenterology; SPD= central supply; ER=Emergency Room
